# Supplementary material for: Deep Reinforcement Learning for Vectored Thruster Autonomous Underwater Vehicle Control
Source: Hindawi journal article supplement (doi:10.1155/2021/6649625), 2021-01-01
Supplement: f1 [file 6649625.f1.docx]

Appendix A. Element terms of dynamic equations of motion

(A.1)

(A.2)

(A.3)

(A.4)

Appendix B. Hydrodynamic and thrust coefficients of the AUV

|  |  |  |  |
| --- | --- | --- | --- |
|  |  |  |  |
|  |  |  |  |
|  |  |  |  |
|  |  |  |  |
|  |  |  |  |
|  |  |  |  |
|  |  |  |  |
|  |  |  |  |
|  |  |  |  |
